## Retraction

# Retraction: Suppression of microRNA-205-5p in human mesenchymal stem cells improves their therapeutic potential in treating diabetic foot disease

Lingyan Zhu<sup>1</sup>, Gongxian Wang<sup>2,\*</sup>, Shane Fischbach<sup>3</sup> and Xiangwei Xiao<sup>3,\*</sup>

<sup>1</sup>Department of Endocrinology, The First Affiliated Hospital of Nanchang University, Nanchang 330006, China

<sup>2</sup>Department of Urology, The First Affiliated Hospital of Nanchang University, Nanchang 330006, China

<sup>3</sup>Division of Pediatric Surgery, Department of Surgery, Children's Hospital of Pittsburgh, University of Pittsburgh School of Medicine, Pittsburgh, PA15224, USA

\*These authors contributed equally to this work

**Published:** December 31, 2025

**Copyright:** © 2025 Zhu et al. This is an open access article distributed under the terms of the [Creative Commons Attribution License](#) (CC BY 4.0), which permits unrestricted use, distribution, and reproduction in any medium, provided the original author and source are credited.

**This article has been retracted:** Oncotarget has completed its investigation of this paper. An image forensic analysis revealed that the von Kossa image in Figure 4B overlaps with an image in Figure 1D of an earlier paper [1]. Furthermore, part of the same von Kossa staining image was reproduced in at least four subsequent publications [2–5], where also the part of the image in Figure 4C “Differentiation of as-miR-205-5p-MSCs into adipocytes by Oil red O staining” was reproduced in Figure 1E of [2], Figure 3E of [3], Figure 1B of [4], and Figure 1E of [5]. Additionally, western blot in Figure 1B contains a duplicate image from Figure 3D of another earlier paper [6], which shares two authors (Shane Fischbach and Xiangwei Xiao) with the retracted article. The documentation provided by corresponding author Xiangwei Xiao regarding the von Kossa staining and western blots did not adequately address the concerns raised. Therefore, the editorial decision was made to retract this paper.

Original article: Oncotarget. 2017; 8:52294–52303. <https://doi.org/10.18632/oncotarget.17012>

## REFERENCES

1. Yan X, Cen Y, Wang Q. Mesenchymal stem cells alleviate experimental rheumatoid arthritis through microRNA-regulated IkB expression. *Sci Rep*. 2016; 6:28915. <https://doi.org/10.1038/srep28915>. [PubMed]
2. Zhang B, Zhang J, Zhu D, Kong Y. Mesenchymal stem cells rejuvenate cardiac muscle after ischemic injury. *Aging (Albany NY)*. 2019; 11:63–72. <https://doi.org/10.18632/aging.101718>. [PubMed]
3. Tan J, Xu Y, Han F, Ye X. Genetical modification on adipose-derived stem cells facilitates facial nerve regeneration. *Aging (Albany NY)*. 2019; 11:908–20. <https://doi.org/10.18632/aging.101790>. [PubMed]
4. Zhang B, Zhao N, Zhang J, Liu Y, Zhu D, Kong Y. Mesenchymal stem cells rejuvenate cardiac muscle through regulating macrophage polarization. *Aging (Albany NY)*. 2019; 11:3900–908. <https://doi.org/10.18632/aging.102009>. [PubMed]
5. Yang C, Qiu Y, Qing Y, Xu J, Dai W, Hu X, Wu X. Synergistic effect of electric stimulation and mesenchymal stem cells against Parkinson's disease. *Aging (Albany NY)*. 2020; 12:16062–71. <https://doi.org/10.18632/aging.103477>. [PubMed]
6. Xiao X, Fischbach S, Song Z, Gaffar I, Zimmerman R, Wiersch J, Prasad K, Shiota C, Guo P, Ramachandran S, Witkowski P, Gittes GK. Transient Suppression of TGFβ Receptor Signaling Facilitates Human Islet Transplantation. *Endocrinology*. 2016; 157:1348–56. <https://doi.org/10.1210/en.2015-1986>. [PubMed]
